# Supplementary material for: Covariance tracking: architecture optimizations for embedded systems
Source: Springer Nature journal article supplement (doi:10.1186/1687-6180-2014-175), 2014-12-01

Input Image  $I(x, y)$

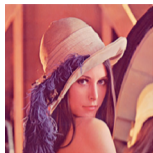

Feature Image Tensor

$$F(x, y) = \phi(I, x, y)$$

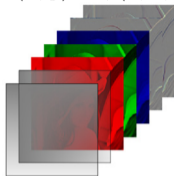

Tensor of Integral Images

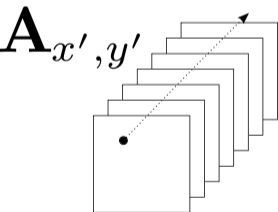

Second order Integral Images Tensor

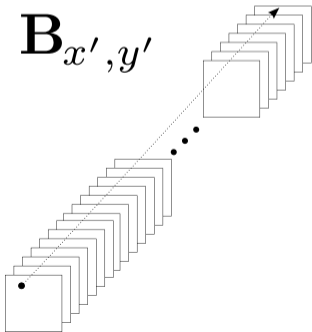

Supplement: 13634_2014_762_MOESM1_ESM.pdf [file 13634_2014_762_MOESM1_ESM.pdf]
