# Supplementary material for: Covariance tracking: architecture optimizations for embedded systems
Source: Springer Nature journal article supplement (doi:10.1186/1687-6180-2014-175), 2014-12-01

Evaluation with KTH-Tips dataset (gradients)

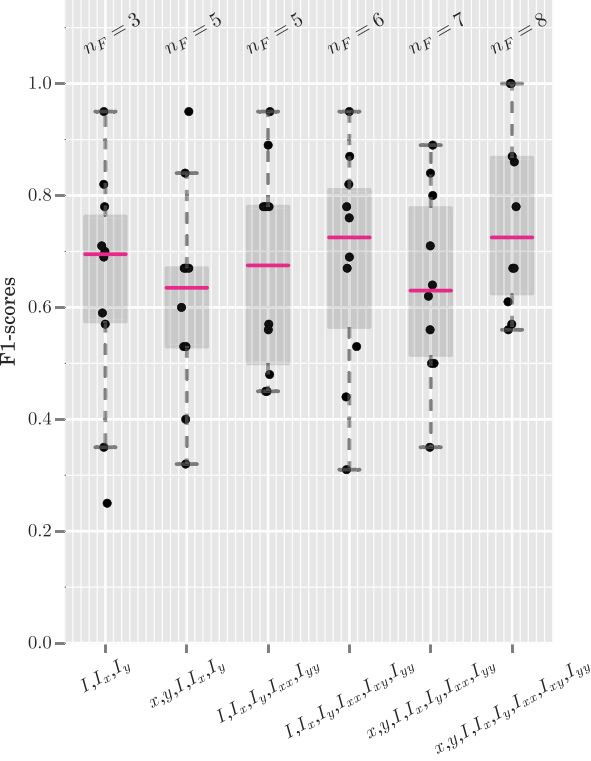

Evaluation with KTH-Tips dataset (ELBCM)

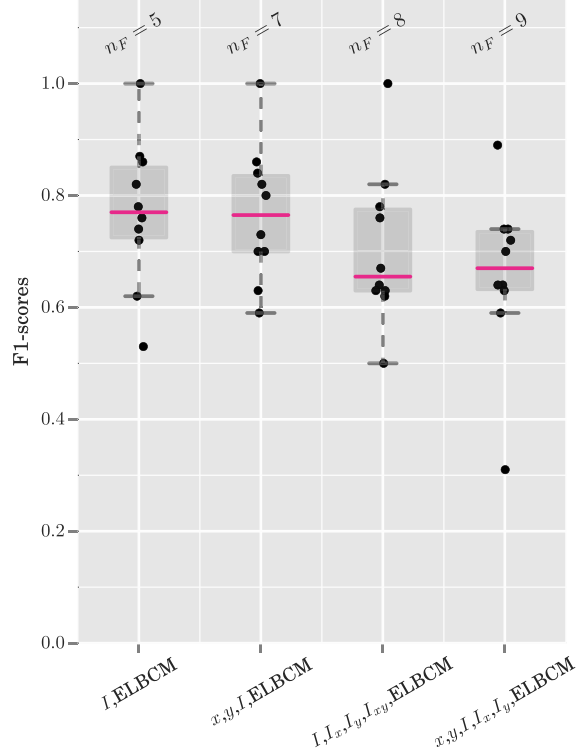

Evaluation with KTH-Tips dataset (color and gradients)

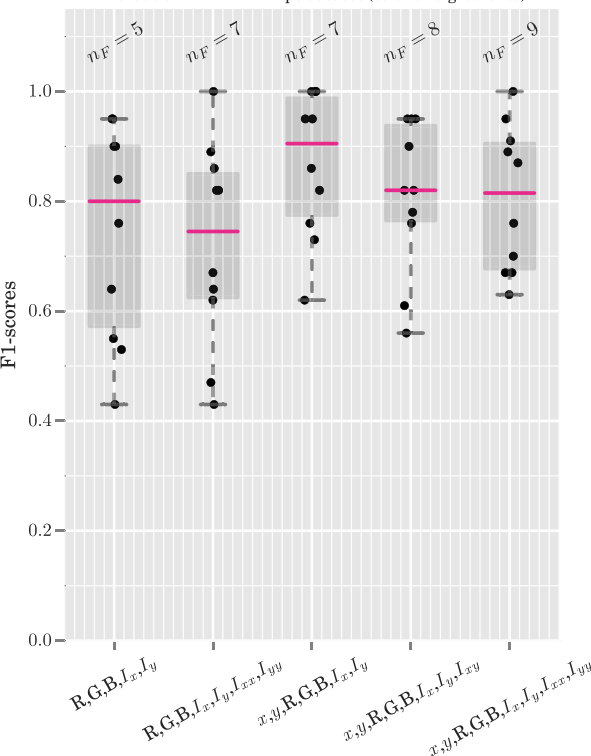

Evaluation with KTH-Tips dataset (color and ELBCM)

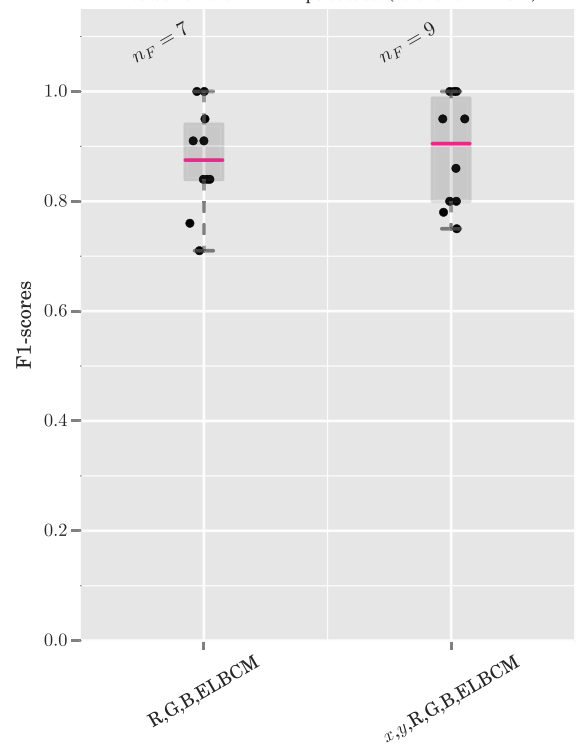

Supplement: 13634_2014_762_MOESM3_ESM.pdf [file 13634_2014_762_MOESM3_ESM.pdf]
