# Supplementary figures and images for: Covariance tracking: architecture optimizations for embedded systems
Source: Springer Nature journal article supplement (doi:10.1186/1687-6180-2014-175), 2014-12-01

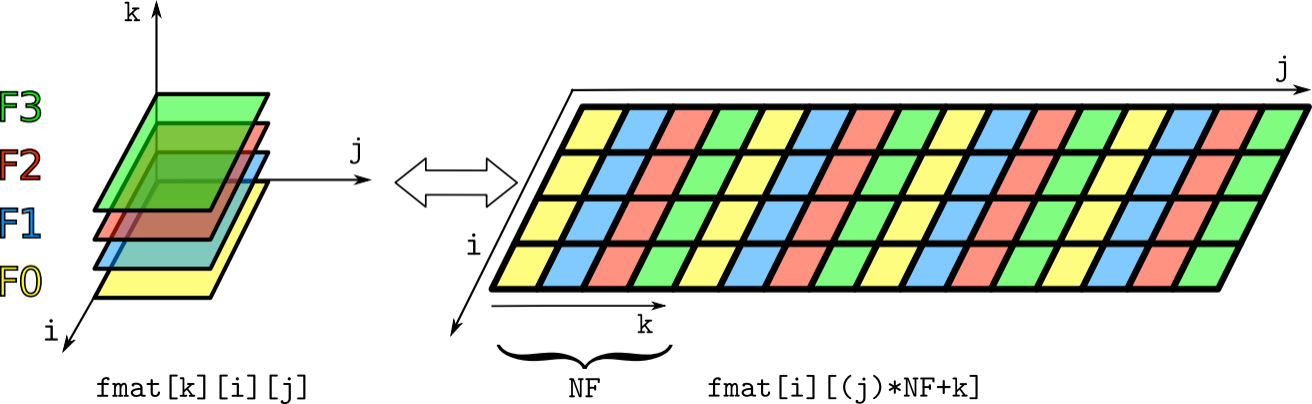

Supplement: 13634_2014_762_MOESM10_ESM.pdf [file 13634_2014_762_MOESM10_ESM.pdf]

# Penryn4

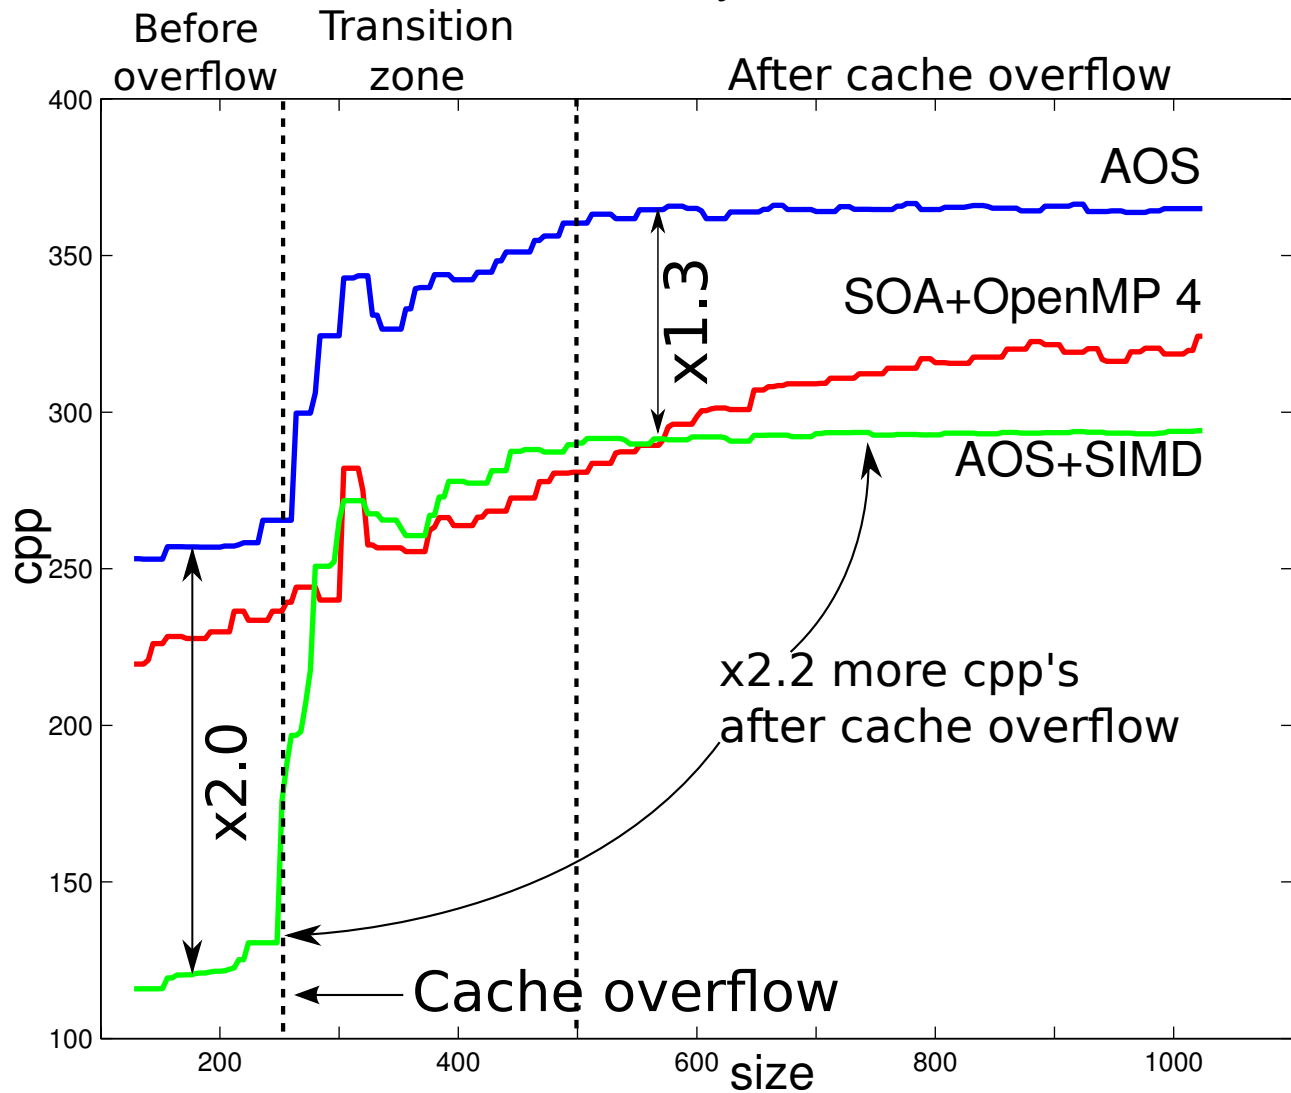

Supplement: 13634_2014_762_MOESM11_ESM.pdf [file 13634_2014_762_MOESM11_ESM.pdf]

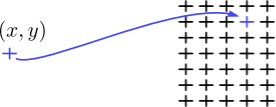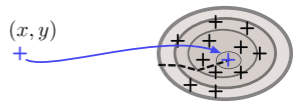

Supplement: 13634_2014_762_MOESM2_ESM.pdf [file 13634_2014_762_MOESM2_ESM.pdf]

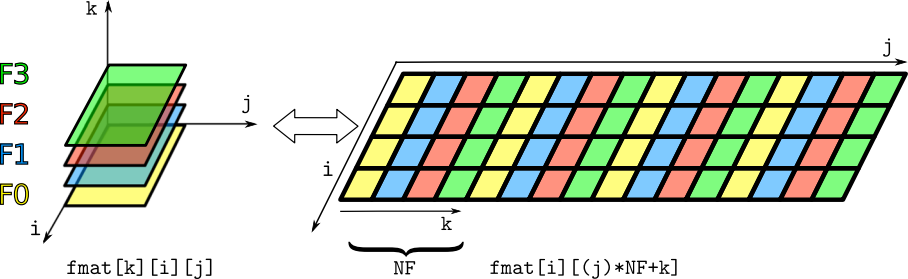

Supplement: 13634_2014_762_MOESM4_ESM.pdf [file 13634_2014_762_MOESM4_ESM.pdf]

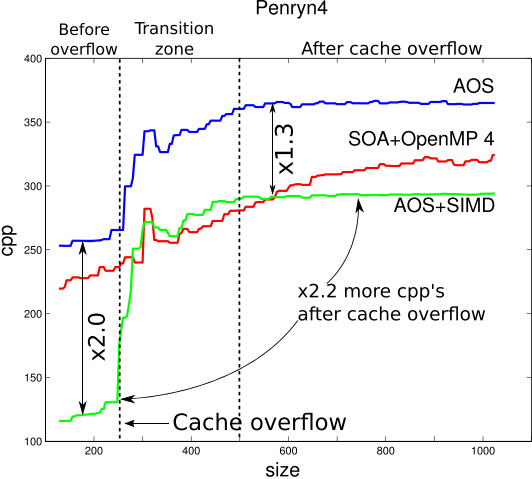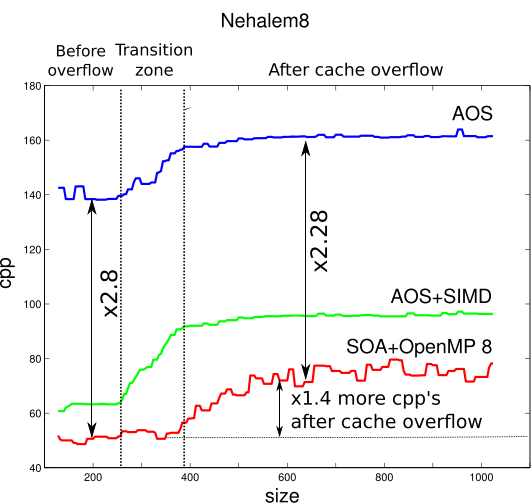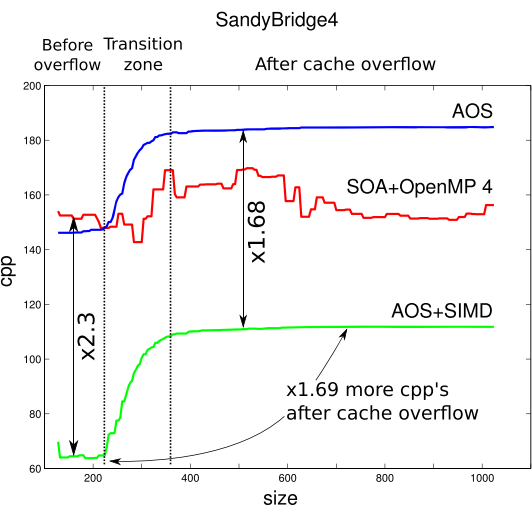

Supplement: 13634_2014_762_MOESM5_ESM.pdf [file 13634_2014_762_MOESM5_ESM.pdf]

PenrynM

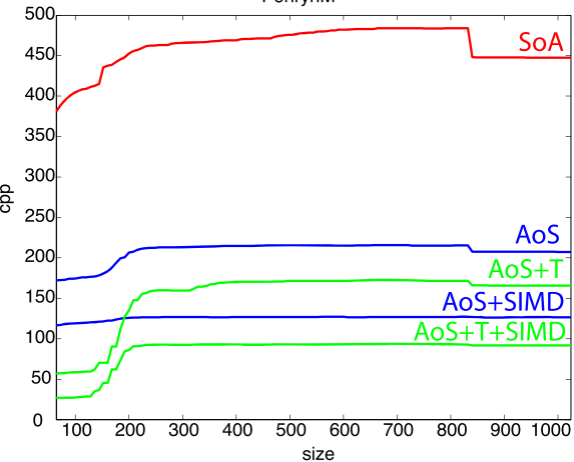

HaswellIM+SSE

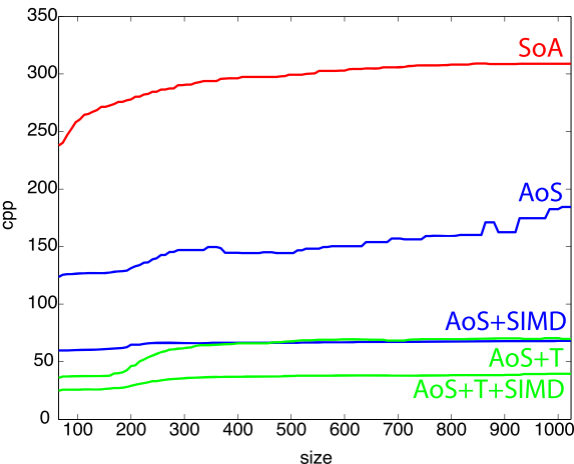

Supplement: 13634_2014_762_MOESM6_ESM.pdf [file 13634_2014_762_MOESM6_ESM.pdf]

Cortex-A9

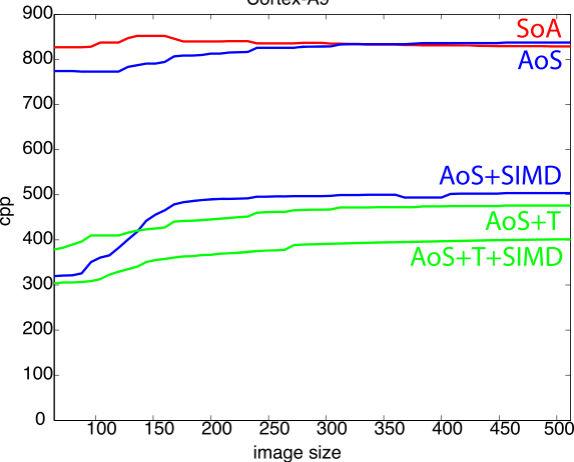

Cortex-A15

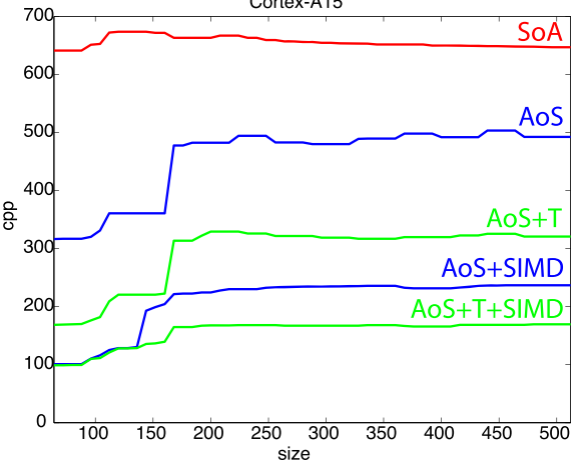

Supplement: 13634_2014_762_MOESM7_ESM.pdf [file 13634_2014_762_MOESM7_ESM.pdf]

Evaluation with KTH-Tips dataset (gradients)

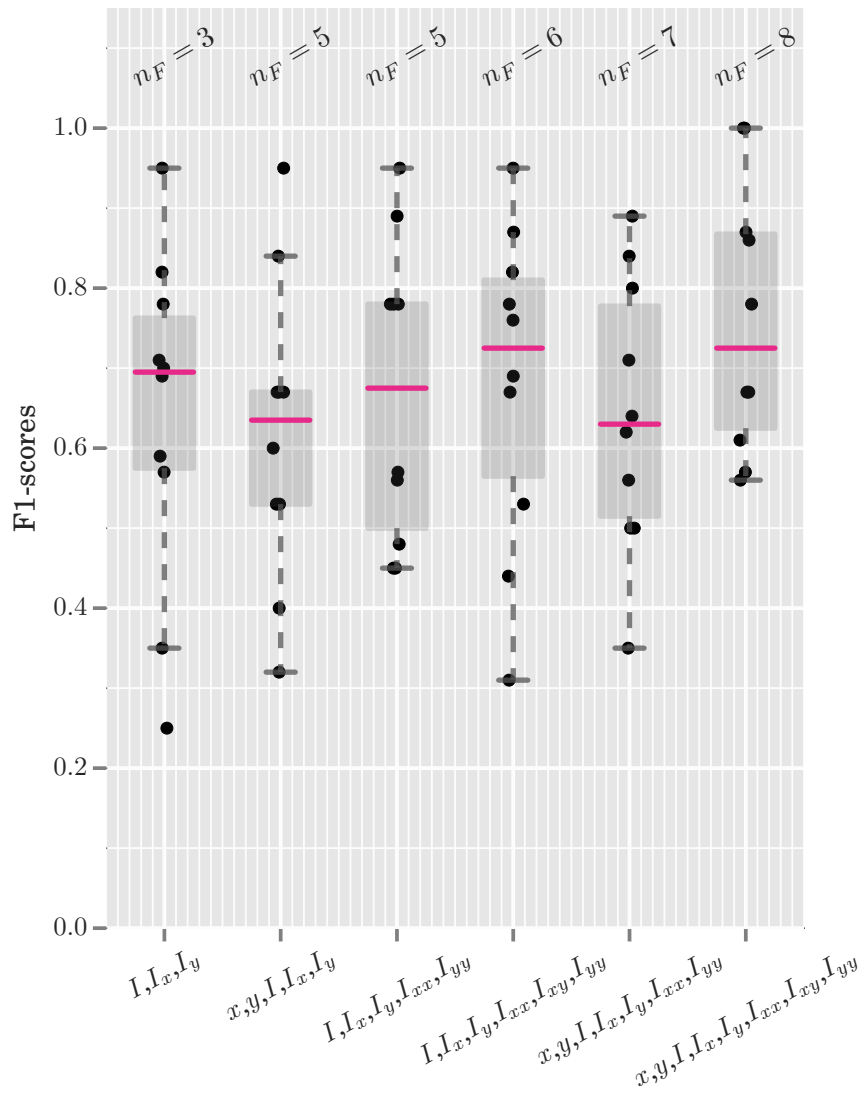

Evaluation with KTH-Tips dataset (ELBCM)

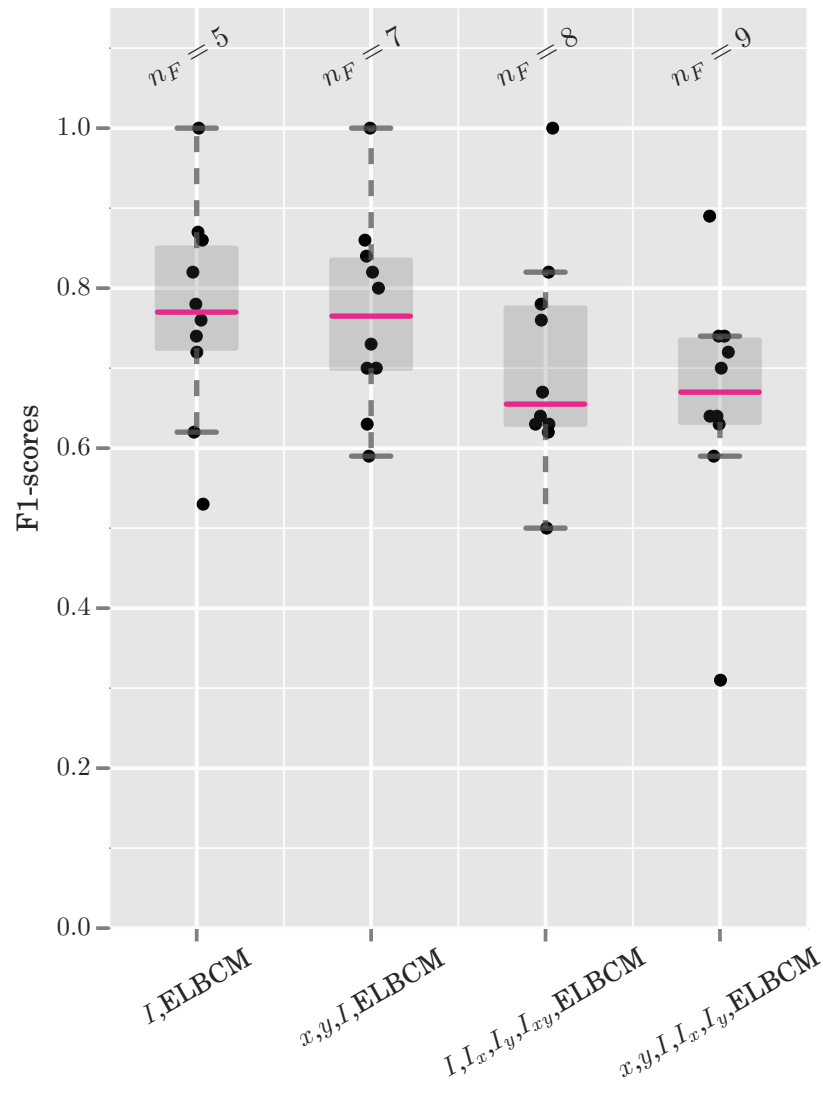

Supplement: 13634_2014_762_MOESM8_ESM.pdf [file 13634_2014_762_MOESM8_ESM.pdf]
